# Supplementary material for: Exploring the influence of resiliency on physician trust in patients: An empirical study of Chinese incidents
Source: PubMed Central journal article supplement (PMC6291099; doi:10.1371/journal.pone.0207394), 2018-12-12
Supplement: pone.0207394.s002.pdf [file pone.0207394.s002.pdf]

## Connor-Davidson Resilience Scale (CD-RISC)

The following is an optional topic, Tick the option you agree with to indicate your level of agreement or disagreement, among them “not true at all (=1); a little true (=2); somewhat true (=3); mostly true (=4); true all the time (=5)”.

| Ordin | Items                                                | Not true at all ←→ True all the time |   |   |   |   |
|-------|------------------------------------------------------|--------------------------------------|---|---|---|---|
| 1     | Prefer to take the lead in problem solving           | 1                                    | 2 | 3 | 4 | 5 |
| 2     | When things look hopeless, I don't give up condition | 1                                    | 2 | 3 | 4 | 5 |
| 3     | Strong sense of purpose                              | 1                                    | 2 | 3 | 4 | 5 |
| 4     | Think of self as strong person                       | 1                                    | 2 | 3 | 4 | 5 |
| 5     | In control of my life                                | 1                                    | 2 | 3 | 4 | 5 |
| 6     | I like challenge                                     | 1                                    | 2 | 3 | 4 | 5 |
| 7     | One can achieve one's goals                          | 1                                    | 2 | 3 | 4 | 5 |
| 8     | Not easily discouraged by failure                    | 1                                    | 2 | 3 | 4 | 5 |
| 9     | Under pressure, focus and think clearly              | 1                                    | 2 | 3 | 4 | 5 |
| 10    | Make unpopular or difficult decisions                | 1                                    | 2 | 3 | 4 | 5 |
| 11    | Can handle unpleasant feelings                       | 1                                    | 2 | 3 | 4 | 5 |
| 12    | Know where to get help                               | 1                                    | 2 | 3 | 4 | 5 |
| 13    | Have to act on a hunch                               | 1                                    | 2 | 3 | 4 | 5 |
| 14    | Things happen for a reason                           | 1                                    | 2 | 3 | 4 | 5 |
| 15    | Tend to bounce back after illness or hardship        | 1                                    | 2 | 3 | 4 | 5 |
| 16    | Best effort no matter what                           | 1                                    | 2 | 3 | 4 | 5 |
| 17    | Able to adapt to change                              | 1                                    | 2 | 3 | 4 | 5 |
| 18    | Coping with stress strengthens                       | 1                                    | 2 | 3 | 4 | 5 |
| 19    | Past success gives confidence for new challenges     | 1                                    | 2 | 3 | 4 | 5 |
| 20    | Pride in your achievements                           | 1                                    | 2 | 3 | 4 | 5 |
| 21    | One works to attain one's goals                      | 1                                    | 2 | 3 | 4 | 5 |
| 22    | See the humorous side of things                      | 1                                    | 2 | 3 | 4 | 5 |
| 23    | Sometimes fate and God can help                      | 1                                    | 2 | 3 | 4 | 5 |
| 24    | Close and secure relationships                       | 1                                    | 2 | 3 | 4 | 5 |
| 25    | Can deal with whatever comes                         | 1                                    | 2 | 3 | 4 | 5 |
